# Supplementary material
Source: PubMed Central journal article supplement (PMC5549833)
Supplement: Supp_Data.pdf [file Supp_Data.pdf]

## Supplementary Data

### Tissue Harvest

Fresh bovine pericardium (BP) was harvested immediately postmortem from young adult cattle (Spear Products, Coopersburg, PA) and shipped on dry ice. Tissue was defrosted and washed in 0.1% (w/v) anhydrous ethylenediaminetetraacetic acid (EDTA), 1% (v/v) antibiotic and antimycotic solution (AAS), phosphate-buffered saline (PBS) (pH 7.4), and 4% (v/v) Tris-HCl (pH 8.0). Tissue underwent dissection to remove connective tissue, and the pericardial sac was cut into 1×16 cm circumferential strips individually stored in Dulbecco's modified Eagle's medium (DMEM) with 15% (v/v) dimethyl sulfoxide (DMSO) at  $-80^{\circ}\text{C}$ .<sup>6,8,17,18</sup>

### Anti-Native Bovine Pericardium Serum Production

As previously described, all procedures were performed in accordance with the University of California IACUC Guide for Care and Use of Laboratory Animals.<sup>8</sup> New Zealand white rabbits ( $n=2$ ) received subcutaneous injections of homogenized BP (1 g in 5 mL of 10 mM tris-HCl (pH 8.0), 1 mM dithiothreitol (DTT), 2 mM magnesium chloride hexahydrate ( $\text{MgCl}_2\cdot 6\text{H}_2\text{O}$ ), 10 mM potassium chloride (KCl), 0.5 mM Pefabloc (protease inhibitor), and Freund's adjuvant at a 1:1 ratio at day 0, 14, 28, and 42.<sup>8</sup> Blood was collected on day 84, centrifuged at 3000  $g$  to generate anti-native BP serum, and stored at  $-80^{\circ}\text{C}$ .

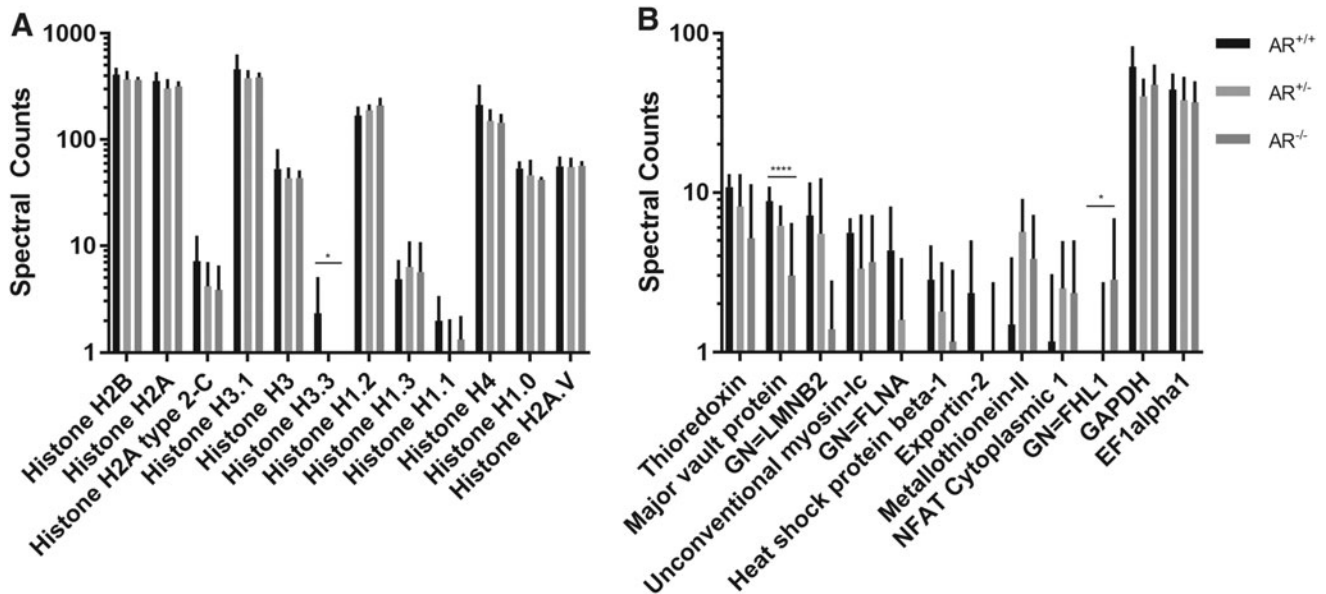

**SUPPLEMENTARY FIG. S1.** Effect of magnesium presence or absence on protein removal during nuclease digestion step. Removal of histones (A) and nuclear-associated proteins (B) during nuclease digestion step is largely unaffected by presence or absence of magnesium. Results plotted in Log [10] scale. \*\*\*\* signifies  $p < 0.0001$  and \* signifies  $p < 0.05$  ( $n = 6$  per group).
